# Supplementary material for: Effect of Ablation-Zone Diameter on Whole-Corneal Higher-Order Aberrations After LASEK: A Retrospective Study
Source: Research Square preprint supplement (doi:10.21203/rs.3.rs-8341631/v1), 2025-12-23
Supplement: Supplementary file 1 [file 6f79f4c8a401bd2828aadff8.docx]

Table 3: Aberrations change per diopter by analysis zone.

| **Diameter** | **△SA/D** | **△CA/D** | **△TA/D** | **△HOAs/D** |
| --- | --- | --- | --- | --- |
| 3mm |  |  |  |  |
| 5.75 mm Group | 0.0031 ± 0.0050 | 0.0097 ± 0.0107 | 0.0020 ± 0.0039 | 0.0111 ± 0.0092 |
| 6 mm Group | -0.0003 ± 0.0083 | 0.0086 ± 0.0098 | 0.0026 ± 0.0060 | 0.0097 ± 0.0104 |
| 6.25 mm Group | 0.0003 ± 0.0199 | 0.0110 ± 0.0129 | 0.0042 ± 0.0126 | 0.0115 ± 0.0141 |
| p-Value | 0.4466 | 0.6496 | 0.4634 | 0.7574 |
| 4mm |  |  |  |  |
| 5.75 mm Group | 0.0140 ± 0.0123 | 0.0279 ± 0.0243 | 0.0042 ± 0.0079 | 0.0324 ± 0.0221 |
| 6 mm Group | 0.0059 ± 0.0192 | 0.0242 ± 0.0204 | 0.0058 ± 0.0147 | 0.0261 ± 0.0243 |
| 6.25 mm Group | 0.0029 ± 0.0209 | 0.0267 ± 0.0298 | 0.0072 ± 0.0272 | 0.0293 ± 0.0351 |
| p-Value | 0.0180* | 0.8005 | 0.7624 | 0.5929 |
| 5mm |  |  |  |  |
| 5.75 mm Group | 0.0452 ± 0.0211 | 0.0645 ± 0.0449 | 0.0069 ± 0.0128 | 0.0791 ± 0.0421 |
| 6 mm Group | 0.0332 ± 0.0314 | 0.0535 ± 0.0442 | 0.0090 ± 0.0263 | 0.0672 ± 0.0428 |
| 6.25 mm Group | 0.0323 ± 0.0434 | 0.0580 ± 0.0580 | 0.0120 ± 0.0465 | 0.0741 ± 0.0618 |
| p-Value | 0.1516 | 0.6029 | 0.7701 | 0.5573 |
| 6mm |  |  |  |  |
| 5.75 mm Group | 0.1121 ± 0.0299 | 0.1195 ± 0.0773 | 0.0102 ± 0.0206 | 0.1648 ± 0.0663 |
| 6 mm Group | 0.1034 ± 0.0401 | 0.0956 ± 0.0807 | 0.0126 ± 0.0403 | 0.1471 ± 0.0625 |
| 6.25 mm Group | 0.1143 ± 0.0715 | 0.1086 ± 0.0977 | 0.0230 ± 0.0820 | 0.1757 ± 0.0995 |
| p-Value | 0.5914 | 0.4568 | 0.5273 | 0.2570 |

SA: spherical equivalent; CA: coma; TA: trefoil aberration; HOAs: higher-order aberrations; *P < 0.05.
